# Supplementary material for: Comparative environmental assessment of zeolites synthesized from chemicals and natural minerals
Source: Royal Society of Chemistry journal article supplement (doi:10.1039/d3gc05146c), 2024-01-01
Supplement: d3gc05146c1.pdf [file d3gc05146c1.pdf]

Supporting information for

**Comparative environmental assessment of zeolites synthesized from chemicals and natural minerals**

Xiaoling Chen<sup>1</sup>, Guoxi Xiao<sup>1,2</sup>, Tiesen Li<sup>1,2,\*</sup>, Chan Wang<sup>1,2</sup>, Qingyan Cui<sup>1,2</sup>, Xiaojun Bao<sup>1,2</sup> and Yuanyuan Yue<sup>1,2,\*</sup>

<sup>1</sup>*National Engineering Research Center of Chemical Fertilizer Catalyst, College of Chemical Engineering, Fuzhou University, Fuzhou 350002, P. R. China.*

<sup>2</sup>*Qingyuan Innovation Laboratory, Quanzhou 362801, Fujian Province, P. R. China.*

*\*Corresponding authors. E-mails: litiesen@fzu.edu.cn (T. Li); yueyy@fzu.edu.cn (Y. Yue).*

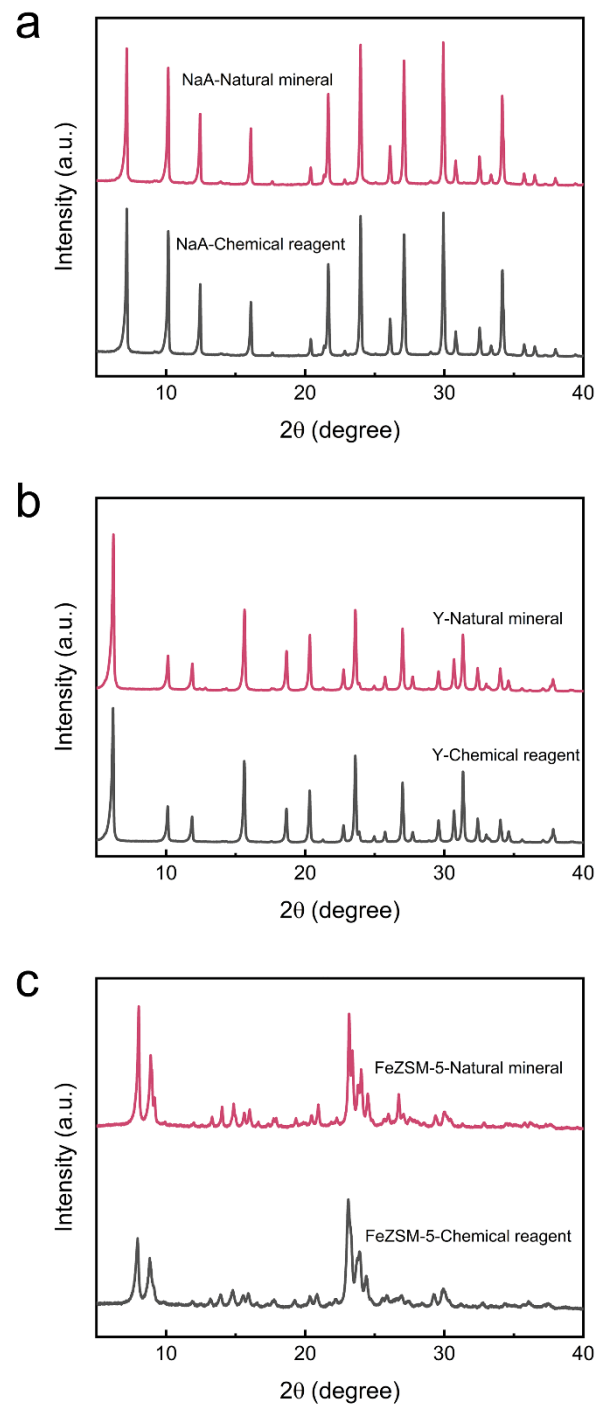

**Fig. S1.** XRD patterns of different (a) NaA, (b) Y and (c) FeZSM-5 zeolites.

**Table S1.** The transportation distance of raw materials.

| Raw material                        | Transport distance/km |
|-------------------------------------|-----------------------|
| Sodium hydroxide                    | 1149                  |
| Sodium silicate                     | 932                   |
| Sodium aluminum                     | 1225                  |
| Sulfuric acid                       | 1027                  |
| Tetrapropylammonium bromide (TPABr) | 460                   |
| Ferrous sulfate                     | 1189                  |
| Kaolin                              | 688                   |
| Diatomite                           | 1469                  |
| Rectorite                           | 1016                  |

**Table S2.** Input and output inventories to produce one ton of NaA zeolite from chemicals.

|          | Category         | Unit            | Value  | Database source |
|----------|------------------|-----------------|--------|-----------------|
| Output   | NaA zeolite      | ton             | 1.00   |                 |
| Input    | Sodium silicate  | ton             | 0.44   | CLCD            |
|          | Sodium aluminate | ton             | 0.45   | Ecoinvent 3.1   |
|          | Sodium hydroxide | ton             | 0.95   | Ecoinvent 3.1   |
|          | Synthetic water  | ton             | 12.08  | CLCD            |
|          | Washing water    | ton             | 9.44   | CLCD            |
|          | Electricity      | kW·h            | 181.61 | CLCD            |
|          | Natural gas      | Nm <sup>3</sup> | 0.22   | CLCD            |
|          | Transport        | ton·km          | 113.78 | CLCD            |
| Emission | Wastewater       | ton             | 21.41  | CLCD            |

**Table S3.** Input and output inventories to produce one ton of natural mineral through dry processing route.

|          | Category        | Unit | Value    | Database source                                |
|----------|-----------------|------|----------|------------------------------------------------|
| Output   | Nature mineral  | ton  | 1.00     |                                                |
|          | Sandstone       | ton  | 1.92     |                                                |
| Input    | Ore             | ton  | 2.90     | CLCD                                           |
|          | Synthetic water | kg   | 0.34     | CLCD                                           |
|          | Electricity     | kW·h | 11.60    | CLCD                                           |
| Emission | Particulate     | kg   | 7.96E-04 | Negligible: Material with a weight ratio < 1 % |

**Table S4.** Input and output inventories to produce one ton of NaA zeolite from natural minerals.

•Preparation of SMS-K

|        | Category         | Unit            | Value | Database source |
|--------|------------------|-----------------|-------|-----------------|
| Output | SMS-K            | ton             | 1.00  |                 |
| Input  | Kaolin           | ton             | 0.48  | Foreground data |
|        | Sodium hydroxide | ton             | 0.73  | Ecoinvent 3.1   |
|        | Synthetic water  | ton             | 0.68  | CLCD            |
|        | Electricity      | kW·h            | 5.00  | CLCD            |
|        | Natural gas      | Nm <sup>3</sup> | 58.37 | CLCD            |
|        | Transport        | ton·km          | 65.00 | CLCD            |

•Preparation of NaA zeolite

|          | Category        | Unit            | Value  | Database source |
|----------|-----------------|-----------------|--------|-----------------|
| Output   | NaA zeolite     | ton             | 1.00   |                 |
| Input    | SMS-K           | ton             | 1.46   | Foreground data |
|          | Synthetic water | ton             | 11.12  | CLCD            |
|          | Washing water   | ton             | 9.02   | CLCD            |
|          | Electricity     | kW·h            | 158.22 | CLCD            |
|          | Natural gas     | Nm <sup>3</sup> | 0.14   | CLCD            |
| Emission | Wastewater      | ton             | 20.79  | CLCD            |

**Table S5.** Input and output inventories to produce one ton of Y zeolite from chemicals.

| •Preparation of SDA       |                  |                 |        |                 |
|---------------------------|------------------|-----------------|--------|-----------------|
|                           | Category         | Unit            | Value  | Database source |
| Output                    | SDA              | ton             | 1.00   |                 |
| Input                     | Sodium silicate  | ton             | 0.16   | CLCD            |
|                           | Sodium aluminate | ton             | 0.02   | Ecoinvent 3.1   |
|                           | Sodium hydroxide | ton             | 0.12   | Ecoinvent 3.1   |
|                           | Synthetic water  | ton             | 0.79   | CLCD            |
|                           | Electricity      | kW·h            | 1.20   | CLCD            |
|                           | Transport        | ton·km          | 10.64  | CLCD            |
| •Preparation of Y zeolite |                  |                 |        |                 |
|                           | Category         | Unit            | Value  | Database source |
| Output                    | Y zeolite        | ton             | 1.00   |                 |
| Input                     | Sodium silicate  | ton             | 1.13   | CLCD            |
|                           | Sodium aluminate | ton             | 0.27   | Ecoinvent 3.1   |
|                           | SDA              | ton             | 1.34   | Foreground data |
|                           | Sulfuric acid    | ton             | 0.10   | CLCD            |
|                           | Synthetic water  | ton             | 7.12   | CLCD            |
|                           | Washing water    | ton             | 9.10   | CLCD            |
|                           | Electricity      | kW·h            | 175.90 | CLCD            |
|                           | Natural gas      | Nm <sup>3</sup> | 0.31   | CLCD            |
|                           | Transport        | ton·km          | 64.05  | CLCD            |
| Emission                  | Wastewater       | ton             | 17.25  | CLCD            |

**Table S6.** Input and output inventories to produce one ton of Y zeolite from natural minerals.

•Preparation of thermal activated diatomite (T-D)

|        | Category    | Unit            | Value  | Database source |
|--------|-------------|-----------------|--------|-----------------|
| Output | T-D         | ton             | 1.00   |                 |
| Input  | Diatomite   | ton             | 1.02   | Foreground data |
|        | Natural gas | Nm <sup>3</sup> | 141.12 | CLCD            |
|        | Transport   | ton·km          | 48.97  | CLCD            |

•Preparation of SMS-Kaolin-Y

|        | Category         | Unit            | Value | Database source |
|--------|------------------|-----------------|-------|-----------------|
| Output | SMS-Kaolin-Y     | ton             | 1.00  |                 |
| Input  | Kaolin           | ton             | 0.56  | Foreground data |
|        | Sodium hydroxide | ton             | 0.56  | Ecoinvent 3.1   |
|        | Synthetic water  | ton             | 0.79  | CLCD            |
|        | Electricity      | kW·h            | 5.00  | CLCD            |
|        | Natural gas      | Nm <sup>3</sup> | 67.78 | CLCD            |
|        | Transport        | ton·km          | 34.50 | CLCD            |



•Preparation of SDA

|        | Category         | Unit   | Value | Database source |
|--------|------------------|--------|-------|-----------------|
| Output | SDA              | ton    | 1.00  |                 |
| Input  | Sodium silicate  | ton    | 0.16  | CLCD            |
|        | Sodium aluminate | ton    | 0.02  | Ecoinvent 3.1   |
|        | Sodium hydroxide | ton    | 0.12  | Ecoinvent 3.1   |
|        | Synthetic water  | ton    | 0.79  | CLCD            |
|        | Electricity      | kW·h   | 1.20  | CLCD            |
|        | Transport        | ton·km | 10.64 | CLCD            |

•Preparation of Y zeolite

|          | Category        | Unit            | Value  | Database source |
|----------|-----------------|-----------------|--------|-----------------|
| Output   | Y zeolite       | ton             | 1.00   |                 |
| Input    | T-D             | ton             | 0.75   | Foreground data |
|          | SMS-Kaolin-Y    | ton             | 0.61   | Foreground data |
|          | SDA             | ton             | 1.29   | Foreground data |
|          | Sulfuric acid   | ton             | 0.10   | CLCD            |
|          | Synthetic water | ton             | 6.76   | CLCD            |
|          | Washing water   | ton             | 9.99   | CLCD            |
|          | Electricity     | kW·h            | 159.96 | CLCD            |
|          | Natural gas     | Nm <sup>3</sup> | 0.31   | CLCD            |
|          | Transport       | ton·km          | 3.36   | CLCD            |
| Emission | Wastewater      | ton             | 17.75  | CLCD            |

**Table S7.** Input and output inventories to produce one ton of FeZSM-5 zeolite from chemicals.

|          | Category         | Unit            | Value  | Database source |
|----------|------------------|-----------------|--------|-----------------|
| Output   | FeZSM-5 zeolite  | ton             | 1.00   |                 |
| Input    | Solid silica     | ton             | 1.71   | CLCD            |
|          | Sodium aluminate | ton             | 0.14   | Ecoinvent 3.1   |
|          | Sodium hydroxide | ton             | 0.33   | Ecoinvent 3.1   |
|          | TPABr            | ton             | 0.41   | CLCD            |
|          | Ferrous sulfate  | ton             | 0.08   | CLCD            |
|          | Synthetic water  | ton             | 9.37   | CLCD            |
|          | Washing water    | ton             | 10.14  | CLCD            |
|          | Electricity      | kW·h            | 173.16 | CLCD            |
|          | Natural gas      | Nm <sup>3</sup> | 10.27  | CLCD            |
|          | Transport        | ton·km          | 80.91  | CLCD            |
| Emission | Wastewater       | ton             | 19.59  | CLCD            |

**Table S8.** Input and output inventories to produce one ton of FeZSM-5 zeolite from natural minerals.

•Preparation of T-D

|        | Category    | Unit            | Value  | Database source |
|--------|-------------|-----------------|--------|-----------------|
| Output | T-D         | ton             | 1.00   |                 |
| Input  | Diatomite   | ton             | 1.02   | Foreground data |
|        | Natural gas | Nm <sup>3</sup> | 141.12 | CLCD            |
|        | Transport   | ton·km          | 48.97  | CLCD            |

•Preparation of SMS-R

|        | Category         | Unit            | Value | Database source |
|--------|------------------|-----------------|-------|-----------------|
| Output | SMS-Rectorite    | ton             | 1.00  |                 |
| Input  | Rectorite        | ton             | 0.39  | Foreground data |
|        | Sodium hydroxide | ton             | 0.78  | Ecoinvent 3.1   |
|        | Synthetic water  | ton             | 0.54  | CLCD            |
|        | Electricity      | kW·h            | 5.00  | CLCD            |
|        | Natural gas      | Nm <sup>3</sup> | 47.18 | CLCD            |
|        | Transport        | ton·km          | 43.32 | CLCD            |

·Preparation of FeZSM-5 zeolite

|          | Category             | Unit            | Value  | Database source |
|----------|----------------------|-----------------|--------|-----------------|
| Output   | FeZSM-5 zeolite      | ton             | 1.00   |                 |
| Input    | T-D                  | ton             | 1.20   | Foreground data |
|          | SMS-Rectorite        | ton             | 0.03   | Foreground data |
|          | Sodium hydroxide     | ton             | 0.22   | Ecoinvent 3.1   |
|          | Seed (ZSM-5 zeolite) | ton             | 0.14   | Foreground data |
|          | Synthetic water      | ton             | 6.71   | CLCD            |
|          | Washing water        | ton             | 9.92   | CLCD            |
|          | Electricity          | kW·h            | 145.00 | CLCD            |
|          | Natural gas          | Nm <sup>3</sup> | 12.62  | CLCD            |
|          | Transport            | ton·km          | 8.39   | CLCD            |
| Emission | Wastewater           | ton             | 16.70  | CLCD            |

**Table S9.** LCA impact category indicators and uncertainty analysis results of the synthesis of NaA zeolite from chemicals.

|                       | Value  | Unit            | GWP<br>kg CO <sub>2</sub> eq./kg NaA<br>zeolite | PED<br>MJ/kg<br>NaA zeolite | WU<br>kg/kg<br>NaA zeolite | ADP<br>kg SO <sub>2</sub> eq./kg<br>NaA zeolite | AP<br>kg Sb eq./kg<br>NaA zeolite | EP<br>kg PO <sub>4</sub> <sup>3-</sup> eq./kg NaA<br>zeolite | RI<br>Kg PM2.5 eq./kg<br>NaA zeolite |
|-----------------------|--------|-----------------|-------------------------------------------------|-----------------------------|----------------------------|-------------------------------------------------|-----------------------------------|--------------------------------------------------------------|--------------------------------------|
| Sodium silicate       | 0.44   | ton             | 7.25E-01                                        | 1.15E+01                    | 1.30E+01                   | 8.42E-07                                        | 4.05E-04                          | 4.20E-04                                                     | 1.17E-04                             |
| Sodium aluminate      | 0.45   | ton             | 1.47E+00                                        | 2.01E+01                    | 7.65E-03                   | 1.03E-04                                        | 1.08E-02                          | 2.63E-03                                                     | 1.77E-03                             |
| Sodium hydroxide      | 0.95   | ton             | 1.28E+00                                        | 2.08E+01                    | 9.30E-03                   | 2.03E-05                                        | 8.53E-03                          | 3.14E-03                                                     | 1.79E-03                             |
| Water                 | 21.52  | ton             | 4.10E-03                                        | 5.40E-02                    | 2.19E+01                   | 3.85E-09                                        | 2.16E-05                          | 2.22E-06                                                     | 6.61E-06                             |
| Electricity           | 181.61 | kW·h            | 1.34E-01                                        | 1.89E+00                    | 5.04E-01                   | 8.47E-08                                        | 7.10E-04                          | 4.60E-05                                                     | 2.09E-04                             |
| Natural gas           | 0.22   | Nm <sup>3</sup> | 4.41E-05                                        | 6.44E-04                    | 8.66E-05                   | 4.39E-11                                        | 2.76E-08                          | 2.53E-09                                                     | 3.00E-09                             |
| Transport             | 113.78 | ton·km          | 8.34E-03                                        | 8.04E-02                    | 6.96E-03                   | 2.83E-08                                        | 1.69E-04                          | 3.03E-05                                                     | 3.19E-05                             |
| Wastewater            | 21.41  | ton             | 2.04E-02                                        | 9.25E-02                    | 5.75E-02                   | 2.18E-09                                        | 1.24E-05                          | 2.36E-04                                                     | 1.92E-06                             |
| Total                 |        |                 | 3.64E+00                                        | 5.45E+01                    | 3.55E+01                   | 1.24E-04                                        | 2.06E-02                          | 6.50E-03                                                     | 3.95E-03                             |
| Uncertainty of result |        |                 | 8.06%                                           | 6.39%                       | 16.29%                     | 14.78%                                          | 6.91%                             | 7.61%                                                        | 5.72%                                |

**Table S10.** LCA impact category indicators and uncertainty analysis results of the synthesis of NaA zeolite from natural minerals.

|                       |                  | Value  | Unit            | GWP<br>kg CO <sub>2</sub> eq./kg<br>NaA zeolite | PED<br>MJ/kg<br>NaA zeolite | WU<br>kg/kg<br>NaA zeolite | ADP<br>kg SO <sub>2</sub> eq./kg<br>NaA zeolite | AP<br>kg Sb eq./kg<br>NaA zeolite | EP<br>kg PO <sub>4</sub> <sup>3-</sup> eq./kg<br>NaA zeolite | RI<br>Kg PM2.5 eq./kg<br>NaA zeolite |
|-----------------------|------------------|--------|-----------------|-------------------------------------------------|-----------------------------|----------------------------|-------------------------------------------------|-----------------------------------|--------------------------------------------------------------|--------------------------------------|
| SMS-K                 | Kaolin           | 0.70   | ton             | 3.89E-03                                        | 5.07E-02                    | 9.73E-03                   | 8.86E-09                                        | 4.11E-05                          | 5.79E-06                                                     | 9.84E-06                             |
|                       | Water            | 0.99   | ton             | 1.88E-04                                        | 2.47E-03                    | 1.00E+00                   | 1.76E-10                                        | 9.88E-07                          | 1.02E-07                                                     | 3.03E-07                             |
|                       | Electricity      | 7.30   | kW·h            | 5.38E-03                                        | 7.59E-02                    | 2.02E-02                   | 3.40E-09                                        | 2.85E-05                          | 1.85E-06                                                     | 8.37E-06                             |
|                       | Sodium hydroxide | 1.07   | ton             | 1.43E+00                                        | 2.32E+01                    | 1.04E-02                   | 2.27E-05                                        | 9.54E-03                          | 3.51E-03                                                     | 2.00E-03                             |
|                       | Natural gas      | 85.22  | Nm <sup>3</sup> | 1.72E-02                                        | 2.51E-01                    | 3.37E-02                   | 1.71E-08                                        | 1.08E-05                          | 9.85E-07                                                     | 1.17E-06                             |
| Water                 |                  | 20.14  | ton             | 3.84E-03                                        | 5.05E-02                    | 2.05E+01                   | 3.60E-09                                        | 2.02E-05                          | 2.07E-06                                                     | 6.19E-06                             |
| Electricity           |                  | 158.22 | kW·h            | 1.17E-01                                        | 1.65E+00                    | 4.39E-01                   | 7.38E-08                                        | 6.18E-04                          | 4.01E-05                                                     | 1.82E-04                             |
| Natural gas           |                  | 0.14   | Nm <sup>3</sup> | 2.81E-05                                        | 4.11E-04                    | 5.53E-05                   | 2.80E-11                                        | 1.76E-08                          | 1.61E-09                                                     | 1.92E-09                             |
| Transport             |                  | 94.90  | ton·km          | 6.94E-03                                        | 6.69E-02                    | 5.79E-03                   | 2.36E-08                                        | 1.41E-04                          | 2.52E-05                                                     | 2.66E-05                             |
| Wastewater            |                  | 20.79  | ton             | 1.98E-02                                        | 8.99E-02                    | 5.58E-02                   | 2.12E-09                                        | 1.20E-05                          | 2.29E-04                                                     | 1.86E-06                             |
| Total                 |                  |        |                 | 1.61E+00                                        | 2.54E+01                    | 2.21E+01                   | 2.28E-05                                        | 1.04E-02                          | 3.81E-03                                                     | 2.23E-03                             |
| Uncertainty of result |                  |        |                 | 14.97%                                          | 11.86%                      | 23.72%                     | 10.23%                                          | 12.08%                            | 13.55%                                                       | 10.75%                               |

**Table S11.** LCA impact category indicators and uncertainty analysis results of the synthesis of Y zeolite from chemicals.

|                       |                  | Value  | Unit            | GWP<br>kg CO <sub>2</sub> eq./kg<br>Y zeolite | PED<br>MJ/kg<br>Y zeolite | WU<br>kg/kg<br>Y zeolite | ADP<br>kg SO <sub>2</sub> eq./kg<br>Y zeolite | AP<br>kg Sb eq./kg<br>Y zeolite | EP<br>kg PO <sub>4</sub> <sup>3-</sup> eq./kg<br>Y zeolite | RI<br>Kg PM2.5 eq./kg<br>Y zeolite |
|-----------------------|------------------|--------|-----------------|-----------------------------------------------|---------------------------|--------------------------|-----------------------------------------------|---------------------------------|------------------------------------------------------------|------------------------------------|
| SDA                   | Sodium silicate  | 0.21   | ton             | 3.56E-01                                      | 5.66E+00                  | 6.36E+00                 | 4.13E-07                                      | 1.99E-04                        | 2.07E-04                                                   | 5.74E-05                           |
|                       | Sodium aluminate | 0.03   | ton             | 9.80E-02                                      | 1.34E+00                  | 5.11E-04                 | 6.85E-06                                      | 7.21E-04                        | 1.76E-04                                                   | 1.18E-04                           |
|                       | Sodium hydroxide | 0.16   | ton             | 2.24E-01                                      | 3.62E+00                  | 1.62E-03                 | 3.53E-06                                      | 1.49E-03                        | 5.47E-04                                                   | 3.11E-04                           |
|                       | Water            | 1.06   | ton             | 1.78E-04                                      | 2.34E-03                  | 9.53E-01                 | 1.67E-10                                      | 9.36E-07                        | 9.64E-08                                                   | 2.87E-07                           |
|                       | Electricity      | 1.61   | kW·h            | 1.18E-03                                      | 1.67E-02                  | 4.46E-03                 | 7.49E-10                                      | 6.28E-06                        | 4.07E-07                                                   | 1.85E-06                           |
| Sodium silicate       |                  | 1.13   | ton             | 1.88E+00                                      | 2.99E+01                  | 3.36E+01                 | 2.19E-06                                      | 1.05E-03                        | 1.09E-03                                                   | 3.04E-04                           |
| Sodium aluminate      |                  | 0.27   | ton             | 8.83E-01                                      | 1.21E+01                  | 4.60E-03                 | 6.17E-05                                      | 6.49E-03                        | 1.58E-03                                                   | 1.06E-03                           |
| Sulfuric acid         |                  | 0.10   | ton             | 5.92E-03                                      | 1.96E-01                  | 1.30E-01                 | 3.26E-06                                      | 3.16E-05                        | 4.11E-05                                                   | 7.12E-06                           |
| Water                 |                  | 16.22  | ton             | 3.09E-03                                      | 4.07E-02                  | 1.65E+01                 | 2.90E-09                                      | 1.63E-05                        | 1.67E-06                                                   | 4.98E-06                           |
| Electricity           |                  | 175.90 | kW·h            | 1.30E-01                                      | 1.83E+00                  | 4.89E-01                 | 8.21E-08                                      | 6.88E-04                        | 4.46E-05                                                   | 2.02E-04                           |
| Natural gas           |                  | 0.31   | Nm <sup>3</sup> | 6.28E-05                                      | 9.19E-04                  | 1.24E-04                 | 6.27E-11                                      | 3.94E-08                        | 3.61E-09                                                   | 4.28E-09                           |
| Transport             |                  | 78.31  | ton·km          | 5.74E-03                                      | 5.53E-02                  | 4.79E-03                 | 1.96E-08                                      | 1.16E-04                        | 2.09E-05                                                   | 2.20E-05                           |
| Wastewater            |                  | 17.25  | ton             | 1.65E-02                                      | 7.46E-02                  | 4.63E-02                 | 1.76E-09                                      | 9.98E-06                        | 1.90E-04                                                   | 1.54E-06                           |
| Total                 |                  |        |                 | 3.61E+00                                      | 5.48E+01                  | 5.82E+01                 | 7.80E-05                                      | 1.08E-02                        | 3.90E-03                                                   | 2.13E-03                           |
| Uncertainty of result |                  |        |                 | 11.84%                                        | 9.75%                     | 11.97%                   | 16.74%                                        | 7.57%                           | 7.07%                                                      | 5.54%                              |

**Table S12.** LCA impact category indicators and uncertainty analysis results of the synthesis of Y zeolite from natural minerals.

|                       |                  | Value  | Unit            | GWP<br>kg CO <sub>2</sub> eq./kg<br>Y zeolite | PED<br>MJ/kg<br>Y zeolite | WU<br>kg/kg<br>Y zeolite | ADP<br>kg SO <sub>2</sub> eq./kg<br>Y zeolite | AP<br>kg Sb eq./kg<br>Y zeolite | EP<br>kg PO <sub>4</sub> <sup>3-</sup> eq./kg<br>Y zeolite | RI<br>Kg PM2.5 eq./kg<br>Y zeolite |
|-----------------------|------------------|--------|-----------------|-----------------------------------------------|---------------------------|--------------------------|-----------------------------------------------|---------------------------------|------------------------------------------------------------|------------------------------------|
| T-D                   | Diatomite        | 0.77   | ton             | 4.11E-03                                      | 5.36E-02                  | 1.03E-02                 | 9.35E-09                                      | 4.35E-05                        | 6.13E-06                                                   | 1.04E-05                           |
|                       | Natural gas      | 105.84 | Nm <sup>3</sup> | 2.13E-02                                      | 3.12E-01                  | 4.19E-02                 | 2.12E-08                                      | 1.34E-05                        | 1.22E-06                                                   | 1.45E-06                           |
| SMS-Kaolin-Y          | Kaolin           | 0.34   | ton             | 1.89E-03                                      | 2.46E-02                  | 4.73E-03                 | 4.30E-09                                      | 1.99E-05                        | 2.82E-06                                                   | 4.78E-06                           |
|                       | Water            | 0.48   | ton             | 9.15E-05                                      | 1.20E-03                  | 4.88E-01                 | 8.60E-11                                      | 4.80E-07                        | 4.94E-08                                                   | 1.47E-07                           |
|                       | Electricity      | 3.05   | kW·h            | 2.25E-03                                      | 3.18E-02                  | 8.47E-03                 | 1.42E-09                                      | 1.19E-05                        | 7.74E-07                                                   | 3.50E-06                           |
|                       | Sodium hydroxide | 0.34   | ton             | 4.65E-01                                      | 7.50E+00                  | 3.37E-03                 | 7.32E-06                                      | 3.09E-03                        | 1.13E-03                                                   | 6.46E-04                           |
|                       | Natural gas      | 41.35  | Nm <sup>3</sup> | 8.35E-03                                      | 1.22E-01                  | 1.64E-02                 | 8.29E-09                                      | 5.23E-06                        | 4.79E-07                                                   | 5.69E-07                           |
| SDA                   | Sodium silicate  | 0.21   | ton             | 3.43E-01                                      | 5.45E+00                  | 6.12E+00                 | 3.98E-07                                      | 1.91E-04                        | 1.99E-04                                                   | 5.53E-05                           |
|                       | Sodium aluminate | 0.03   | ton             | 9.47E-02                                      | 1.29E+00                  | 4.94E-04                 | 6.62E-06                                      | 6.97E-04                        | 1.70E-04                                                   | 1.14E-04                           |
|                       | Sodium hydroxide | 0.15   | ton             | 2.15E-01                                      | 3.48E+00                  | 1.56E-03                 | 3.40E-06                                      | 1.43E-03                        | 5.26E-04                                                   | 3.00E-04                           |
|                       | Water            | 1.02   | ton             | 1.71E-04                                      | 2.26E-03                  | 9.18E-01                 | 1.61E-10                                      | 9.02E-07                        | 9.28E-08                                                   | 2.76E-07                           |
|                       | Electricity      | 1.55   | kW·h            | 1.14E-03                                      | 1.61E-02                  | 4.30E-03                 | 7.21E-10                                      | 6.04E-06                        | 3.92E-07                                                   | 1.78E-06                           |
| Sulfuric acid         |                  | 0.10   | ton             | 5.74E-03                                      | 1.90E-01                  | 1.26E-01                 | 3.17E-06                                      | 3.07E-05                        | 3.99E-05                                                   | 6.91E-06                           |
| Water                 |                  | 16.75  | ton             | 3.19E-03                                      | 4.20E-02                  | 1.71E+01                 | 3.00E-09                                      | 1.68E-05                        | 1.73E-06                                                   | 5.14E-06                           |
| Electricity           |                  | 159.96 | kW·h            | 1.18E-01                                      | 1.66E+00                  | 4.45E-01                 | 7.46E-08                                      | 6.25E-04                        | 4.05E-05                                                   | 1.84E-04                           |
| Natural gas           |                  | 0.31   | Nm <sup>3</sup> | 6.32E-05                                      | 9.24E-04                  | 1.24E-04                 | 6.30E-11                                      | 3.96E-08                        | 3.63E-09                                                   | 4.31E-09                           |
| Transport             |                  | 74.87  | ton·km          | 5.24E-03                                      | 5.05E-02                  | 4.37E-03                 | 1.78E-08                                      | 1.06E-04                        | 1.90E-05                                                   | 1.99E-05                           |
| Wastewater            |                  | 17.75  | ton             | 1.69E-02                                      | 7.67E-02                  | 4.76E-02                 | 1.81E-09                                      | 1.03E-05                        | 1.95E-04                                                   | 1.59E-06                           |
| Total                 |                  |        |                 | 1.31E+00                                      | 2.03E+01                  | 2.53E+01                 | 2.11E-05                                      | 6.30E-03                        | 2.33E-03                                                   | 1.36E-03                           |
| Uncertainty of result |                  |        |                 | 12.37%                                        | 9.82%                     | 9.78%                    | 23.40%                                        | 9.77%                           | 10.37%                                                     | 9.01%                              |



**Table S13.** LCA impact category indicators and uncertainty analysis results of the synthesis of FeZSM-5 zeolite from chemicals.

|                       | Value  | Unit            | GWP<br>kg CO <sub>2</sub> eq./kg<br>FeZSM-5 zeolite | PED<br>MJ/kg<br>FeZSM-5 zeolite | WU<br>kg/kg<br>FeZSM-5 zeolite | ADP<br>kg SO <sub>2</sub> eq./kg<br>FeZSM-5 zeolite | AP<br>kg Sb eq./kg<br>FeZSM-5 zeolite | EP<br>kg PO <sub>4</sub> <sup>3-</sup> eq./kg<br>FeZSM-5 zeolite | RI<br>Kg PM2.5 eq./kg<br>FeZSM-5 zeolite |
|-----------------------|--------|-----------------|-----------------------------------------------------|---------------------------------|--------------------------------|-----------------------------------------------------|---------------------------------------|------------------------------------------------------------------|------------------------------------------|
| Solid silica          | 1.71   | ton             | 7.83E-02                                            | 1.99E+00                        | 3.16E+00                       | 3.93E-07                                            | 6.26E-05                              | 1.28E-05                                                         | 2.30E-04                                 |
| Sodium aluminate      | 0.14   | ton             | 4.48E-01                                            | 6.13E+00                        | 2.34E-03                       | 3.13E-05                                            | 3.30E-03                              | 8.04E-04                                                         | 5.40E-04                                 |
| Sodium hydroxide      | 0.33   | ton             | 4.51E-01                                            | 7.29E+00                        | 3.27E-03                       | 7.12E-06                                            | 3.00E-03                              | 1.10E-03                                                         | 6.27E-04                                 |
| TPABr                 | 0.41   | ton             | 1.65E+00                                            | 4.14E+01                        | 9.89E+01                       | 1.57E-05                                            | 7.98E-03                              | 1.68E-03                                                         | 1.10E-03                                 |
| Ferrous sulfate       | 0.08   | ton             | 4.61E-01                                            | 5.59E+00                        | 1.61E+01                       | 4.76E-06                                            | 4.42E-03                              | 5.77E-04                                                         | 9.10E-04                                 |
| Water                 | 19.51  | ton             | 3.72E-03                                            | 4.89E-02                        | 1.99E+01                       | 3.49E-09                                            | 1.95E-05                              | 2.01E-06                                                         | 6.00E-06                                 |
| Electricity           | 173.16 | kW·h            | 1.28E-01                                            | 1.80E+00                        | 4.81E-01                       | 8.07E-08                                            | 6.77E-04                              | 4.39E-05                                                         | 1.99E-04                                 |
| Natural gas           | 10.27  | Nm <sup>3</sup> | 2.07E-03                                            | 3.03E-02                        | 4.08E-03                       | 2.07E-09                                            | 1.30E-06                              | 1.19E-07                                                         | 1.41E-07                                 |
| Transport             | 80.91  | ton·km          | 5.93E-03                                            | 5.72E-02                        | 4.95E-03                       | 2.01E-08                                            | 1.20E-04                              | 2.16E-05                                                         | 2.27E-05                                 |
| Wastewater            | 19.59  | ton             | 1.87E-02                                            | 8.47E-02                        | 5.26E-02                       | 2.00E-09                                            | 1.13E-05                              | 2.16E-04                                                         | 1.75E-06                                 |
| Total                 |        |                 | 3.25E+00                                            | 6.44E+01                        | 1.39E+02                       | 5.94E-05                                            | 1.96E-02                              | 4.46E-03                                                         | 3.64E-03                                 |
| Uncertainty of result |        |                 | 6.49%                                               | 7.25%                           | 14.49%                         | 10.38%                                              | 4.97%                                 | 5.78%                                                            | 4.70%                                    |

**Table S14.** LCA impact category indicators and uncertainty analysis results of the synthesis of FeZSM-5 zeolite from natural minerals.

|                       |                  | Value  | Unit            | GWP<br>kg CO <sub>2</sub> eq./kg<br>FeZSM-5 zeolite | PED<br>MJ/kg<br>FeZSM-5 zeolite | WU<br>kg/kg<br>FeZSM-5 zeolite | ADP<br>kg SO <sub>2</sub> eq./kg<br>FeZSM-5 zeolite | AP<br>kg Sb eq./kg<br>FeZSM-5 zeolite | EP<br>kg PO <sub>4</sub> <sup>3-</sup> eq./kg<br>FeZSM-5 zeolite | RI<br>Kg PM2.5 eq./kg<br>FeZSM-5 zeolite |
|-----------------------|------------------|--------|-----------------|-----------------------------------------------------|---------------------------------|--------------------------------|-----------------------------------------------------|---------------------------------------|------------------------------------------------------------------|------------------------------------------|
| T-D                   | Diatomite        | 1.22   | ton             | 6.60E-03                                            | 8.61E-02                        | 1.66E-02                       | 1.50E-08                                            | 6.98E-05                              | 9.84E-06                                                         | 1.67E-05                                 |
|                       | Natural gas      | 169.34 | Nm <sup>3</sup> | 3.42E-02                                            | 5.01E-01                        | 6.73E-02                       | 3.41E-08                                            | 2.15E-05                              | 1.96E-06                                                         | 2.33E-06                                 |
| SMS-<br>Rectorite     | Rectorite        | 0.01   | ton             | 6.50E-05                                            | 8.46E-04                        | 1.63E-04                       | 1.48E-10                                            | 6.86E-07                              | 9.66E-08                                                         | 1.64E-07                                 |
|                       | Water            | 0.02   | ton             | 3.13E-06                                            | 4.12E-05                        | 1.68E-02                       | 2.94E-12                                            | 1.65E-08                              | 1.69E-09                                                         | 5.06E-09                                 |
|                       | Electricity      | 0.15   | kW·h            | 1.11E-04                                            | 1.57E-03                        | 4.18E-04                       | 7.01E-11                                            | 5.87E-07                              | 3.82E-08                                                         | 1.73E-07                                 |
|                       | Sodium hydroxide | 0.02   | ton             | 3.19E-02                                            | 5.18E-01                        | 2.31E-04                       | 5.06E-07                                            | 2.13E-04                              | 7.80E-05                                                         | 4.45E-05                                 |
|                       | Natural gas      | 1.42   | Nm <sup>3</sup> | 2.87E-04                                            | 4.18E-03                        | 5.63E-04                       | 2.86E-10                                            | 1.80E-07                              | 1.64E-08                                                         | 1.95E-08                                 |
| Seed                  |                  | 0.14   | ton             | 3.80E-01                                            | 8.00E+00                        | 1.67E+01                       | 7.44E-06                                            | 2.07E-03                              | 5.28E-04                                                         | 3.74E-04                                 |
| Sodium hydroxide      |                  | 0.22   | ton             | 2.96E-01                                            | 4.79E+00                        | 2.15E-03                       | 4.68E-06                                            | 1.97E-03                              | 7.24E-04                                                         | 4.12E-04                                 |
| Water                 |                  | 16.63  | ton             | 3.17E-03                                            | 4.17E-02                        | 1.69E+01                       | 2.98E-09                                            | 1.67E-05                              | 1.71E-06                                                         | 5.11E-06                                 |
| Electricity           |                  | 145.00 | kW·h            | 1.07E-01                                            | 1.51E+00                        | 4.03E-01                       | 6.76E-08                                            | 5.67E-04                              | 3.67E-05                                                         | 1.67E-04                                 |
| Natural gas           |                  | 12.62  | Nm <sup>3</sup> | 2.55E-03                                            | 3.73E-02                        | 5.01E-03                       | 2.54E-09                                            | 1.60E-06                              | 1.46E-07                                                         | 1.74E-07                                 |
| Transport             |                  | 68.45  | ton·km          | 5.02E-03                                            | 4.85E-02                        | 4.18E-03                       | 1.71E-08                                            | 1.02E-04                              | 1.82E-05                                                         | 1.92E-05                                 |
| Wastewater            |                  | 16.70  | ton             | 1.59E-02                                            | 7.22E-02                        | 4.48E-02                       | 1.70E-09                                            | 9.66E-06                              | 1.84E-04                                                         | 1.50E-06                                 |
| Total                 |                  |        |                 | 8.82E-01                                            | 1.56E+01                        | 3.42E+01                       | 1.28E-05                                            | 5.04E-03                              | 1.58E-03                                                         | 1.04E-03                                 |
| Uncertainty of result |                  |        |                 | 8.82%                                               | 8.24%                           | 9.33%                          | 19.66%                                              | 7.02%                                 | 7.60%                                                            | 6.36%                                    |

**Table S15.** Atom economy calculations of the synthesis of NaA zeolite from chemicals.

| Reactant                        | Molecular weight | Utilized atom | Mass of utilized atom | Unutilized atom    | Mass of unutilized atom |
|---------------------------------|------------------|---------------|-----------------------|--------------------|-------------------------|
| SiO <sub>2</sub>                | 60               | 96 Si, 192 O  | 5769                  | -                  | 0                       |
| Na <sub>2</sub> CO <sub>3</sub> | 106              | 96 Na         | 1104                  | 45 Na, 211 O, 70 C | 5251                    |
| H <sub>2</sub> O                | 18               | -             | 0                     | 1420 H, 710 O      | 12780                   |
| Al(OH) <sub>3</sub>             | 78               | 96 Al, 192 O  | 5662                  | 96 O, 288 H        | 1824                    |
| NaOH                            | 40               | -             | 0                     | 96 Na, 96O, 96H    | 3839                    |
| Total                           |                  |               | 12535                 |                    | 23694                   |

$$\text{Atom economy} = \frac{12535}{(12535+23694)} = 34.60\%$$

**Table S16.** Atom economy calculations of the synthesis of NaA zeolite from natural minerals.

| Reactant                                           | Molecular weight | Utilized atom          | Mass of utilized atom | Unutilized atom      | Mass of unutilized atom |
|----------------------------------------------------|------------------|------------------------|-----------------------|----------------------|-------------------------|
| $\text{Al}_4\text{Si}_4\text{O}_{10}(\text{OH})_8$ | 516              | 96 Si, 96 Al,<br>384 O | 11431                 | 192 H, 48 O          | 960                     |
| $\text{H}_2\text{O}$                               | 18               | -                      | 0                     | 96 O, 192 H          | 1728                    |
| NaOH                                               | 40               | 96 Na                  | 2208                  | 384 Na, 480 O, 480 H | 16992                   |
| Total                                              |                  |                        | 13639                 |                      | 19680                   |

$$\text{Atom economy} = \frac{13639}{13639 + 19680} = 40.93\%$$
